# Supplementary material for: Decreased Levels of Microfibril-Associated Glycoprotein (MAGP)-1 in Patients with Colon Cancer and Obesity Are Associated with Changes in Extracellular Matrix Remodelling
Source: MDPI journal article supplement (doi:10.3390/ijms22168485), 2021-08-06
Supplement: s1 [file s1]

**Supplemental Table S1.** Pathological characteristics of patients with colon cancer.

| <b>Location of primary lesion</b> | <b>n</b> |
|-----------------------------------|----------|
| Transverse colon                  | 5        |
| Right hemicolon                   | 13       |
| Left hemicolon                    | 15       |
| Missing                           | 3        |
| <b>TNM stage</b>                  | <b>n</b> |
| I                                 | 5        |
| II                                | 7        |
| III                               | 17       |
| IV                                | 4        |
| Missing                           | 3        |
| <b>Differentiation</b>            | <b>n</b> |
| Well                              | 3        |
| Moderately                        | 25       |
| Poorly and undifferentiated       | 5        |
| Missing                           | 3        |
| <b>Tumor size</b>                 | <b>n</b> |
| ≤ 5 cm                            | 17       |
| > 5 cm                            | 8        |
| Missing                           | 11       |
| <b>Lymph node status</b>          | <b>n</b> |
| Positive                          | 12       |
| Negative                          | 23       |
| Missing                           | 1        |

TNM, tumor, nodes, metastasis.

**Supplemental Table S2.** Primers and probes sequences.

| Gene (GeneBank accession)             | Sequences                               |
|---------------------------------------|-----------------------------------------|
| <b><i>COL6A3</i></b> (NM_004369.3)    |                                         |
| Forward                               | GACGGAGATCTGGCTGATTTACA                 |
| Reverse                               | AGATGCATTAGCCGCTCCAA                    |
| TaqMan <sup>®</sup> Probe             | FAM-AGAACCTCCGCCAAGAAGGAGTCCGT-TAMRA    |
| <b><i>CTNNB1</i></b> (NM_001098209.2) |                                         |
| Forward                               | ACGGCCTGCAGAGCTATTCA                    |
| Reverse                               | TGATCTTCTGCATGTTCCCAAAC                 |
| TaqMan <sup>®</sup> Probe             | FAM-ATTCCTCTCTGACGGCGTGCTCTTCAGT-TAMRA  |
| <b><i>DCN</i></b> (NM_001920.5)       |                                         |
| Forward                               | AGAAGCTCTCCTACATCCGCATT                 |
| Reverse                               | CTGCATCAACTCTGCTGATTTGT                 |
| Probe                                 | FAM-TTCCTCAAGGTCTTCCTCCTTCCCTTACG-TAMRA |
| <b><i>MFAP2</i></b> (NM_002403)       |                                         |
| Forward                               | CAGTGTCTCAACGAGGTCTGCTT                 |
| Reverse                               | ATGGGCACACACTGTACGAACA                  |
| TaqMan <sup>®</sup> Probe             | FAM-TACAGCCTCCGCCGTGTGTACGTCAT-TAMRA    |
| <b><i>MUC2</i></b> (NM_002457)        |                                         |
| Forward                               | ACGGCCTGCAGAGCTATTCA                    |
| Reverse                               | TGATCTTCTGCATGTTCCCAAAC                 |
| TaqMan <sup>®</sup> Probe             | FAM-ATTCCTCTCTGACGGCGTGCTCTTCAGT-TAMRA  |
| <b><i>PTGS2</i></b> (NM_000963.4)     |                                         |
| Forward                               | GCTCAGCCATACAGCAAATCCT                  |
| Reverse                               | TGGTCAAATCCCACACTCATACTATA              |
| TaqMan <sup>®</sup> Probe             | FAM-TGTTCCCACCCATGTCAAACCGAGG-TAMRA     |
| <b><i>SPPI</i></b> (NM_000582)        |                                         |
| Forward                               | CATCCAGTACCCTGATGCTACAGA                |
| Reverse                               | GGCCTTGATATGCACCATTTCAA                 |
| TaqMan <sup>®</sup> Probe             | FAM-ACATCACCTCACACATGGAAAGCGAGGA-TAMRA  |
| <b><i>TGFBI</i></b> (NM_000660)       |                                         |
| Forward                               | GCCCAGCATCTGCAAAGC                      |
| Reverse                               | TCCTTGCGGAAGTCAATGTACA                  |
| TaqMan <sup>®</sup> Probe             | FAM-CACCAACTATTGCTTCAGTCCACGGA-TAMRA    |

*COL6A3*, collagen type 6  $\alpha$ 3 chain; *CTNNB1*, catenin  $\beta$ ; *DCN*, decorin; *MFAP2*, microfibril-associated protein 2; *MUC2*, mucin 2; *PTGS2*, prostaglandin-endoperoxide synthase 2; *SPPI*, secreted phosphoprotein 1; *TGFBI*, transforming growth factor  $\beta$ .

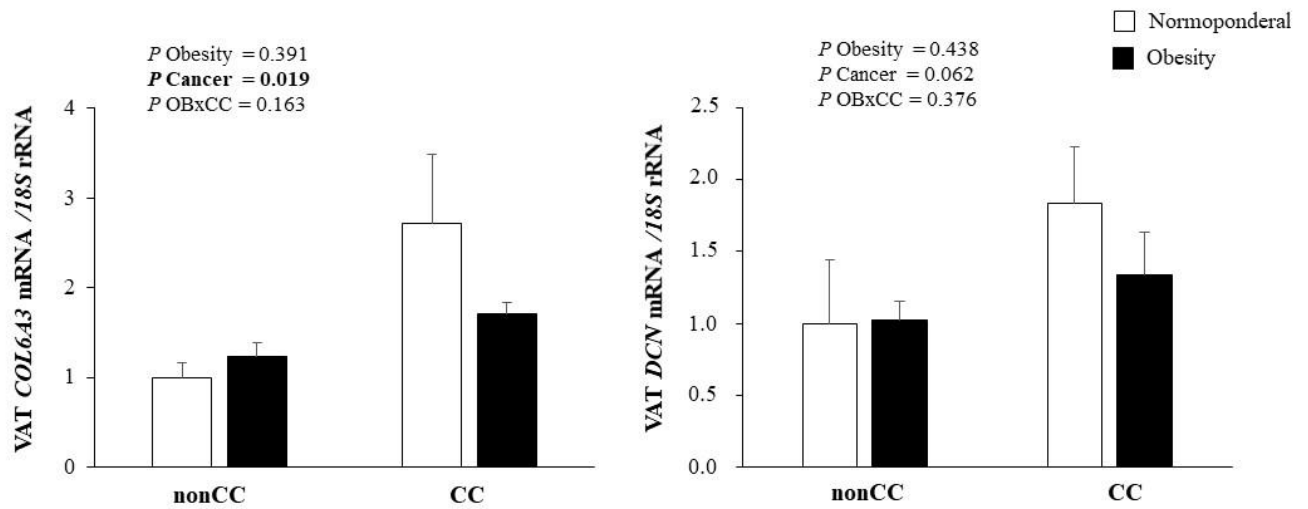

**Supplemental Figure S1.** Effect of obesity and colon cancer (CC) on visceral adipose tissue (VAT) gene expression levels of (A) *COL6A3* and (B) *DCN* from normoponderal subjects (NP) and volunteers with obesity (OB) classified according the presence or absence of colon cancer (CC). Bars represent the mean  $\pm$  SEM. Differences between groups were analyzed by two-way ANCOVA. *COL6A3*, collagen type 6  $\alpha$ 3 chain; *DCN*, decorin.

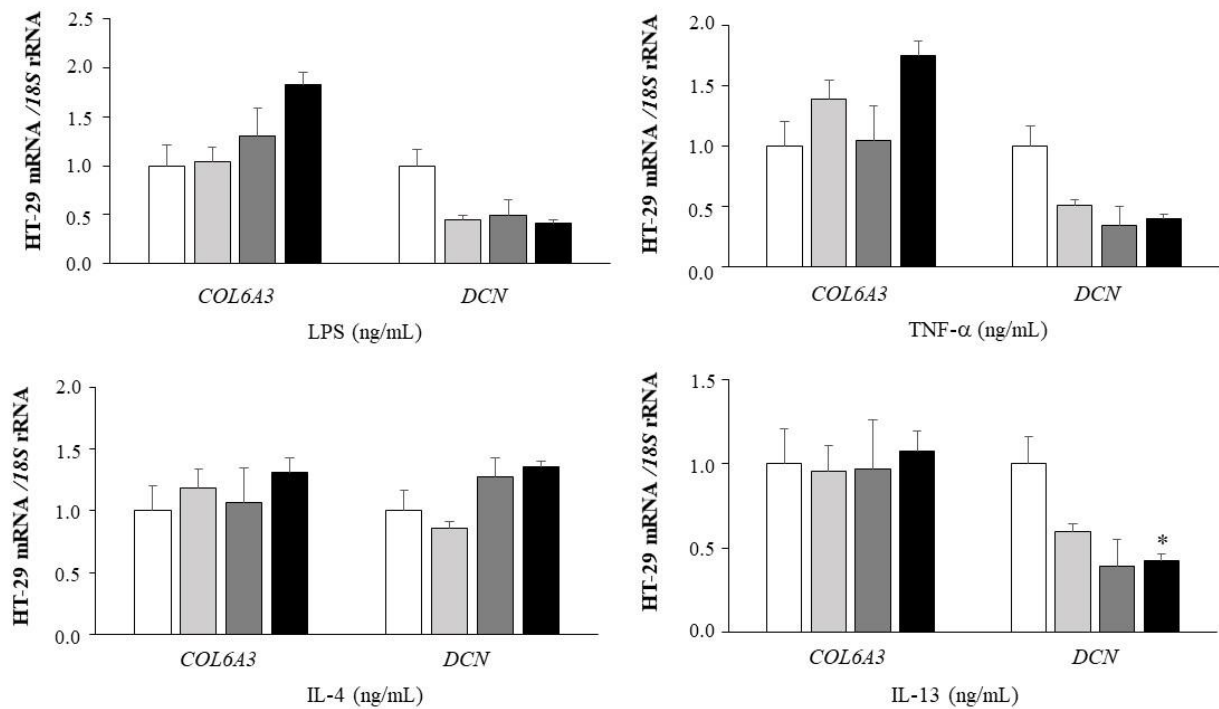

**Supplemental Figure S2.** Impact of inflammation-related factors in the gene expression levels of the *COL6A3* and *DCN* in HT-29 colon cancer cells. Bar graphs show the effect of 24-h treatment with (A) LPS, (B) TNF- $\alpha$ , (C) IL-4 and (D) IL-13 on *COL6A3* and *DCN* mRNA levels. Values are the mean  $\pm$  SEM (n=6 per group). Differences between groups were analyzed by one-way ANOVA followed by Dunnett's tests. \* $P < 0.05$  vs unstimulated cells. *COL6A3*, collagen type 6  $\alpha 3$  chain; *DCN*, decorin.
